# Supplementary material for: The Influence of Micronutrient Trace Metals on Microcystis aeruginosa Growth and Toxin Production
Source: MDPI journal article supplement (doi:10.3390/toxins14110812), 2022-11-21
Supplement: s1 [file s1]

**Table S1.** Concentrations of micronutrients and P in each treatment (n = 3).

| Treatment | Day | Transfer | Co              | Cu              | Fe               | Mn              | Mo              | P             |
|-----------|-----|----------|-----------------|-----------------|------------------|-----------------|-----------------|---------------|
|           |     |          | $\mu\text{g/L}$ | $\mu\text{g/L}$ | $\mu\text{g/L}$  | $\mu\text{g/L}$ | $\mu\text{g/L}$ | $\text{mg/L}$ |
| Control   | 0   | 1        | $2.5 \pm 0.2$   | $3.3 \pm 0.1$   | $302.6 \pm 0.1$  | $98.7 \pm 0.3$  | $2.9 \pm 0$     | $5.3 \pm 0$   |
| -Co       | 0   | 1        | <2              | $3.6 \pm 0.4$   | $298.5 \pm 1.4$  | $95.7 \pm 0.5$  | $3 \pm 0.2$     | $5.3 \pm 0$   |
| -Cu       | 0   | 1        | $2.7 \pm 0.3$   | <2              | $297.6 \pm 2.2$  | $97.6 \pm 0.8$  | $3 \pm 0.2$     | $5.3 \pm 0$   |
| -Fe       | 0   | 1        | $2.9 \pm 0.1$   | $3.1 \pm 0.2$   | $1.1 \pm 0$      | $98.1 \pm 0.3$  | $2.8 \pm 0.2$   | $5.4 \pm 0$   |
| -FeEDTA   | 0   | 1        | $2.9 \pm 0$     | $2.2 \pm 0$     | $4.3 \pm 0.8$    | $96.5 \pm 1.6$  | $2.8 \pm 0.1$   | $5.4 \pm 0.1$ |
| -Mn       | 0   | 1        | $2.6 \pm 0.1$   | $4.9 \pm 0.4$   | $298.4 \pm 1.9$  | $0.8 \pm 0.1$   | $2.8 \pm 0.1$   | $5.3 \pm 0.1$ |
| -Mo       | 0   | 1        | $3 \pm 0.1$     | $3.8 \pm 0.1$   | $304.9 \pm 1.2$  | $98.1 \pm 0.7$  | <1 $\pm 0$      | $5.4 \pm 0$   |
| Control   | 10  | 1        | $2.8 \pm 0.3$   | $3.1 \pm 0.1$   | $286.2 \pm 4.9$  | $97.6 \pm 0.6$  | $2.5 \pm 0$     | $5.3 \pm 0$   |
| -Co       | 10  | 1        | <2              | $3.6 \pm 0.3$   | $285.9 \pm 0.7$  | $95.3 \pm 0.3$  | $2.5 \pm 0$     | $5.3 \pm 0$   |
| -Cu       | 10  | 1        | $2.5 \pm 0.2$   | $1.5 \pm 0$     | $280.6 \pm 7.8$  | $96.3 \pm 0.1$  | $2.4 \pm 0.2$   | $5.3 \pm 0$   |
| -Fe       | 10  | 1        | $2.6 \pm 0$     | $3.1 \pm 0.1$   | <1               | $95.8 \pm 0.6$  | $2.4 \pm 0.1$   | $5.3 \pm 0$   |
| -FeEDTA   | 10  | 1        | $2.5 \pm 0$     | $1.3 \pm 0$     | <1               | $96.6 \pm 0.7$  | $2.5 \pm 0.1$   | $5.4 \pm 0$   |
| -Mn       | 10  | 1        | $2.1 \pm 0$     | $4.9 \pm 0.3$   | $288.8 \pm 3.4$  | $0.4 \pm 0.1$   | $2.3 \pm 0.2$   | $5.2 \pm 0$   |
| -Mo       | 10  | 1        | $2.3 \pm 0$     | $3.2 \pm 0.1$   | $285.4 \pm 5.8$  | $96.7 \pm 0.6$  | <1              | $5.2 \pm 0$   |
| Control   | 20  | 1        | $2.8 \pm 0$     | $2.5 \pm 0$     | $35.1 \pm 8.2$   | $67.3 \pm 3.8$  | $2.7 \pm 0$     | $3.7 \pm 0.1$ |
| -Co       | 20  | 1        | $0 \pm 0$       | $3.4 \pm 0.1$   | $151.3 \pm 24.8$ | $100.5 \pm 2.1$ | $2.7 \pm 0$     | $4.9 \pm 0.1$ |
| -Cu       | 20  | 1        | $2.7 \pm 0$     | $1.1 \pm 0.2$   | $54.6 \pm 6.2$   | $91.7 \pm 1.6$  | $2.7 \pm 0$     | $4.6 \pm 0.1$ |
| -Fe       | 20  | 1        | $2.8 \pm 0$     | $3.3 \pm 0$     | $1.5 \pm 0.2$    | $102.6 \pm 0.9$ | $2.8 \pm 0$     | $5.4 \pm 0$   |
| -Mn       | 20  | 1        | $2.8 \pm 0.1$   | $4.3 \pm 0.2$   | $87.4 \pm 9.6$   | $0.2 \pm 0.1$   | $2.7 \pm 0.1$   | $4.8 \pm 0.1$ |
| -Mo       | 20  | 1        | $2.8 \pm 0$     | $2.8 \pm 0.1$   | $34.2 \pm 8.9$   | $77.9 \pm 5.3$  | $0 \pm 0$       | $4.2 \pm 0.2$ |
| Control   | 31  | 1        | $2.8 \pm 0$     | $2.4 \pm 0.1$   | $26.5 \pm 6.9$   | $28.5 \pm 5$    | $2.7 \pm 0$     | $1.9 \pm 0.1$ |
| -Co       | 31  | 1        | $0 \pm 0$       | $4 \pm 0.1$     | $125.6 \pm 9.3$  | $98.9 \pm 0.8$  | $2.7 \pm 0$     | $5 \pm 0.1$   |
| -Cu       | 31  | 1        | $2.7 \pm 0$     | $1.3 \pm 0.2$   | $26.3 \pm 3.8$   | $35.4 \pm 3.7$  | $2.8 \pm 0$     | $2 \pm 0.2$   |
| -Fe       | 31  | 1        | $2.9 \pm 0$     | $4.7 \pm 0.6$   | $2.1 \pm 0$      | $88 \pm 2.9$    | $2.9 \pm 0$     | $5.5 \pm 0$   |
| -Mn       | 31  | 1        | $2.8 \pm 0$     | $4.5 \pm 0.3$   | $82.1 \pm 13.9$  | $0.1 \pm 0$     | $2.8 \pm 0$     | $3.8 \pm 0.2$ |
| -Mo       | 31  | 1        | $2.8 \pm 0$     | $2.9 \pm 0.1$   | $22.3 \pm 4.1$   | $36 \pm 4.3$    | $0 \pm 0$       | $2.1 \pm 0.1$ |
| Control   | 31  | 2        | $2.9 \pm 0.1$   | $3.6 \pm 0.2$   | $302.6 \pm 1.3$  | $98.1 \pm 1$    | $2.9 \pm 0$     | $5.1 \pm 0$   |
| -Co       | 31  | 2        | $0 \pm 0$       | $3.2 \pm 0.1$   | $300.5 \pm 0.8$  | $97.2 \pm 0.7$  | $2.8 \pm 0$     | $5.3 \pm 0$   |
| -Cu       | 31  | 2        | $2.9 \pm 0$     | $0.6 \pm 0$     | $316 \pm 0.6$    | $101.4 \pm 0.5$ | $2.9 \pm 0$     | $5.2 \pm 0$   |
| -Fe       | 31  | 2        | $2.9 \pm 0$     | $3.4 \pm 0$     | $2.2 \pm 0$      | $101.6 \pm 1.1$ | $2.9 \pm 0$     | $5.3 \pm 0$   |
| -Mn       | 31  | 2        | $2.8 \pm 0$     | $4.5 \pm 0.1$   | $304.9 \pm 1.2$  | $0.2 \pm 0$     | $2.8 \pm 0$     | $5.5 \pm 0$   |
| -Mo       | 31  | 2        | $2.7 \pm 0$     | $5.1 \pm 0.6$   | $304.5 \pm 1.2$  | $95.5 \pm 0.5$  | $0 \pm 0$       | $5.2 \pm 0$   |
| Control   | 40  | 2        | $2.7 \pm 0$     | $3 \pm 0.1$     | $50.9 \pm 3.8$   | $73.5 \pm 0.7$  | $2.8 \pm 0$     | $4.5 \pm 0$   |
| -Co       | 40  | 2        | <2              | $3 \pm 0.1$     | $264.2 \pm 6.2$  | $80.7 \pm 0.6$  | $2.7 \pm 0$     | $5.2 \pm 0$   |
| -Cu       | 40  | 2        | $2.7 \pm 0$     | $0.5 \pm 0$     | $66.9 \pm 12.6$  | $87.9 \pm 3.1$  | $2.7 \pm 0$     | $4.6 \pm 0.1$ |
| -Mn       | 40  | 2        | $2.7 \pm 0$     | $4.1 \pm 0.1$   | $101 \pm 5.9$    | $0.4 \pm 0$     | $2.7 \pm 0$     | $5.2 \pm 0.1$ |
| -Mo       | 40  | 2        | $2.6 \pm 0$     | $4.4 \pm 0.5$   | $81.5 \pm 18.6$  | $81.2 \pm 3.1$  | <0.01 $\pm 0$   | $4.8 \pm 0.1$ |
| Control   | 50  | 2        | $2.6 \pm 0$     | $2.5 \pm 0.1$   | $16.3 \pm 3.9$   | $40.5 \pm 4.7$  | $2.7 \pm 0.1$   | $2.6 \pm 0.1$ |
| -Cu       | 50  | 2        | $2.8 \pm 0$     | $0.5 \pm 0$     | $33.5 \pm 9.8$   | $65.2 \pm 7$    | $2.9 \pm 0$     | $3.2 \pm 0.2$ |
| -Mn       | 50  | 2        | $2.6 \pm 0$     | $3.6 \pm 0.1$   | $106.5 \pm 21.3$ | $0.1 \pm 0$     | $2.7 \pm 0$     | $5.1 \pm 0$   |
| -Mo       | 50  | 2        | $2.6 \pm 0$     | $3.5 \pm 0.4$   | $13.7 \pm 3.2$   | $47.2 \pm 3.6$  | <0.02 $\pm 0$   | $2.7 \pm 0.1$ |
| Control   | 60  | 2        | $2.5 \pm 0$     | $2.6 \pm 0.1$   | $14.7 \pm 1.5$   | $34.9 \pm 2.1$  | $2.7 \pm 0$     | $1.8 \pm 0$   |
| -Cu       | 60  | 2        | $2.6 \pm 0$     | $0.7 \pm 0$     | $20 \pm 2.7$     | $42 \pm 0.4$    | $2.7 \pm 0.1$   | $1.9 \pm 0.1$ |
| -Mn       | 60  | 2        | $2.6 \pm 0.1$   | $3.7 \pm 0$     | $104.1 \pm 4.3$  | $0.4 \pm 0.1$   | $2.7 \pm 0.1$   | $4.6 \pm 0$   |
| -Mo       | 60  | 2        | $2.5 \pm 0$     | $4.1 \pm 0.6$   | $24.1 \pm 1.5$   | $26.7 \pm 3.6$  | <0.02 $\pm 0$   | $2 \pm 0.1$   |

**Table S2.** Recovery of Certified Reference Materials from ICP-AES analysis.

| Sample              | Co          | Cu          | Fe         | Mn          | Mo          | P    |
|---------------------|-------------|-------------|------------|-------------|-------------|------|
|                     | µg/L        | µg/L        | µg/L       | µg/L        | µg/L        | mg/L |
| TM-24.4 avg (n = 4) | 6.67        | 6.97        | 16.4       | 8.86        | 6.43        | ---  |
| Certified Value     | 6.27 ± 0.57 | 6.31 ± 0.60 | 16.0 ± 2.3 | 8.24 ± 0.73 | 6.30 ± 0.56 | ---  |
| Recovery (%)        | 106         | 110         | 102        | 108         | 102         | ---  |

**Table S3.** Recovery of Certified Reference Material from ICP-MS analysis.

| Sample              | Co          | Cu          | Fe         | Mn          | Mo          |
|---------------------|-------------|-------------|------------|-------------|-------------|
| TM24.4 avg (n = 4)  | 6.49        | 6.41        | 15.6       | 8.64        | 6.21        |
| TM-24.4 Certified   | 6.27 ± 0.57 | 6.31 ± 0.60 | 16.0 ± 2.3 | 8.24 ± 0.73 | 6.30 ± 0.56 |
| Recovery (%)        | 104         | 102         | 98         | 105         | 98          |
| TM64.3 avg (n = 4)  | 254         | 261         | 266        | 303         | 285         |
| TMDA-64.3 Certified | 250 ± 16    | 261 ± 18    | 298 ± 21   | 292 ± 17    | 286 ± 21    |
| Recovery (%)        | 102         | 100         | 89         | 104         | 99          |
